# Supplementary material for: Bcl-2 Family Members Bcl-xL and Bax Cooperatively Contribute to Bortezomib Resistance in Mantle Cell Lymphoma
Source: MDPI journal article supplement (doi:10.3390/ijms232214474), 2022-11-21
Supplement: s1 [file s1]

# Bcl-2 family members Bcl-xL and Bax cooperatively contribute to bortezomib resistance in mantle cell lymphoma

Sudjit Luanpitpong <sup>1,\*</sup>, Montira Janan <sup>1,†</sup>, Juthamas Yosudjai <sup>1,†</sup>, Jirarat Poohadsuan <sup>1</sup>, Pithi Chanvorachote <sup>2,3</sup> and Surapol Issaragrisil <sup>1,4,5</sup>

<sup>1</sup> Siriraj Center of Excellence for Stem Cell Research, Faculty of Medicine Siriraj Hospital, Mahidol University, Bangkok 10700, Thailand

<sup>2</sup> Department of Pharmacology and Physiology, Faculty of Pharmaceutical Sciences, Chulalongkorn University, Bangkok 10330, Thailand

<sup>3</sup> Cell-based Drug and Health Product Development Research Unit, Faculty of Pharmaceutical Sciences, Chulalongkorn University, Bangkok 10330, Thailand

<sup>4</sup> Division of Hematology, Department of Medicine, Faculty of Medicine Siriraj Hospital, Mahidol University, Bangkok 10700, Thailand

<sup>5</sup> Bangkok Hematology Center, Wattanosoth Hospital, BDMS Center of Excellence for Cancer, Bangkok 10310, Thailand

\* Correspondence: sudjit.lua@mahidol.edu

† These author authors contributed equally to this work.

**Table S1.** STR analysis of parental Z/Parent and highly BTZ-resistant Z/500R cells used in the present study.

| Locus      | Samples  |         | Reference                 |
|------------|----------|---------|---------------------------|
|            | Z/Parent | Z/500R  | Z-138<br>(RRID:CVCL_B077) |
| Amelogenin | X,Y      | X,Y     | X,Y                       |
| D8S1179    | 8,13     | 8,13    | 8,13                      |
| D21S11     | 30,32.2  | 30,32.2 | 30,32.2                   |
| D7S820     | 8,8      | 8,8     | 8,8                       |
| CSF1PO     | 10,11    | 10,11   | 10,11                     |
| D3S1358    | 16,16    | 16,16   | 16,16                     |
| TH01       | 6,6      | 6,6     | 6,6                       |
| D13S317    | 9,12     | 9,12    | 9,12                      |
| D16S539    | 11,11    | 11,11   | 11,11                     |
| D2S1338    | 19,19    | 19,19   | 19,19                     |
| D19S433    | 12,14    | 12,14   | 12,14                     |
| vWA        | 15,18    | 15,18   | 15,18                     |
| TPOX       | 8,8      | 8,8     | 8,8                       |
| D18S51     | 14,18    | 14,18   | 14,18                     |
| D5S818     | 11,13    | 11,13   | 11,13                     |
| FGA        | 20,22    | 20,22   | 20,22                     |

**Table S2.** STR analysis of Jeko-1 cells used in the present study.

| Locus      | Sample  | Reference                  |
|------------|---------|----------------------------|
|            | Jeko-1  | Jeko-1<br>(RRID:CVCL_1865) |
| Amelogenin | X,X     | X,X                        |
| D8S1179    | 11,14   | 11,14                      |
| D21S11     | 30,33.2 | 30,33.2                    |
| D7S820     | 10,11   | 10,11                      |
| CSF1PO     | 9,12    | 9,12                       |
| D3S1358    | 15,16   | 15,16                      |
| TH01       | 7,7     | 7,7                        |
| D13S317    | 8,9     | 8,9                        |
| D16S539    | 12,12   | 12,12                      |
| D2S1338    | 17,25   | 17,25                      |
| D19S433    | 13,13   | 13,13                      |
| vWA        | 14,14   | 14,14                      |
| TPOX       | 8,8     | 8,8                        |
| D18S51     | 13,15   | 13,15                      |
| D5S818     | 10,13   | 10,13                      |
| FGA        | 21,24   | 21,24                      |
